# Supplementary material for: Genetic assessment of inbred chicken lines indicates genomic signatures of resistance to Marek’s disease
Source: J Anim Sci Biotechnol. 2018 Sep 13;9:65. doi: 10.1186/s40104-018-0281-x (PMC6136188; doi:10.1186/s40104-018-0281-x)
Supplement: Supplementary file 2 — Table S1. GO analysis for 51 genes in 106 identified candidate regions. (XLSX 20 kb) [file 40104_2018_281_MOESM2_ESM.xlsx]

## Sheet: Table S1
Annotation Cluster 1	Enrichment Score: 3.0499070797260184
Category	Term	Count	%	PValue	Genes	List Total	Pop Hits	Pop Total	Fold Enrichment	Bonferroni	Benjamini	FDR
GOTERM_MF_FAT	GO:0004060~arylamine N-acetyltransferase activity	3	6.97674	5.20019e-05	PNAT10, PNAT3, NAT	21	4	6610	236.071	0.00518682	0.00518682	0.0577035
UP_SEQ_FEATURE	active site:Acyl-thioester intermediate	3	6.97674	0.00010372	PNAT10, PNAT3, NAT	14	3	2121	151.5	0.00548238	0.00548238	0.101149
INTERPRO	IPR001447:N-acetyltransferase	3	6.97674	0.000108824	PNAT10, PNAT3, NAT	29	3	4557	157.138	0.0112545	0.0112545	0.121612
KEGG_PATHWAY	gga00232:Caffeine metabolism	3	6.97674	0.000111956	PNAT10, PNAT3, NAT	12	5	3126	156.3	0.00257183	0.00257183	0.0887063
PIR_SUPERFAMILY	PIRSF000426:N-hydroxyarylamine O-acetyltransferase/arylamine N-acetyltransferase/3-amino-5-hydroxybenzoic acid synthase	3	6.97674	0.000200107	PNAT10, PNAT3, NAT	19	3	2137	112.474	0.00379519	0.00379519	0.149871
SP_PIR_KEYWORDS	coenzyme A	3	6.97674	0.000268393	PNAT10, PNAT3, NAT	19	5	3361	106.137	0.0194045	0.0194045	0.279792
GOTERM_MF_FAT	GO:0008080~N-acetyltransferase activity	3	6.97674	0.0021184	PNAT10, PNAT3, NAT	21	23	6610	41.0559	0.191088	0.100605	2.3263
GOTERM_MF_FAT	GO:0016410~N-acyltransferase activity	3	6.97674	0.00270651	PNAT10, PNAT3, NAT	21	26	6610	36.3187	0.237397	0.0863789	2.96333
GOTERM_MF_FAT	GO:0016407~acetyltransferase activity	3	6.97674	0.00313649	PNAT10, PNAT3, NAT	21	28	6610	33.7245	0.269585	0.0755307	3.42668
KEGG_PATHWAY	gga00983:Drug metabolism	3	6.97674	0.00404891	PNAT10, PNAT3, NAT	12	28	3126	27.9107	0.0890926	0.0455853	3.16467
SP_PIR_KEYWORDS	Acyltransferase	3	6.97674	0.00486229	PNAT10, PNAT3, NAT	19	20	3361	26.5342	0.299397	0.162979	4.96036
SP_PIR_KEYWORDS	transferase	4	9.30233	0.201551	AKT1, PNAT10, PNAT3, NAT	19	292	3361	2.42322	1	0.995818	90.4575
Annotation Cluster 2	Enrichment Score: 2.4324075786677977
Category	Term	Count	%	PValue	Genes	List Total	Pop Hits	Pop Total	Fold Enrichment	Bonferroni	Benjamini	FDR
GOTERM_BP_FAT	GO:0006916~anti-apoptosis	4	9.30233	0.000240373	AKT1, CDH13, CFDP1, API5	18	43	5798	29.9638	0.117935	0.117935	0.347679
GOTERM_BP_FAT	GO:0042981~regulation of apoptosis	5	11.6279	0.00269735	AKT1, CDH13, ING4, CFDP1, API5	18	209	5798	7.70601	0.755837	0.505871	3.83751
GOTERM_BP_FAT	GO:0043067~regulation of programmed cell death	5	11.6279	0.00289031	AKT1, CDH13, ING4, CFDP1, API5	18	213	5798	7.56129	0.779295	0.395674	4.10672
GOTERM_BP_FAT	GO:0010941~regulation of cell death	5	11.6279	0.00294001	AKT1, CDH13, ING4, CFDP1, API5	18	214	5798	7.52596	0.784963	0.319029	4.17593
GOTERM_BP_FAT	GO:0043066~negative regulation of apoptosis	4	9.30233	0.00326262	AKT1, CDH13, CFDP1, API5	18	105	5798	12.2709	0.818386	0.289065	4.62414
GOTERM_BP_FAT	GO:0043069~negative regulation of programmed cell death	4	9.30233	0.00344198	AKT1, CDH13, CFDP1, API5	18	107	5798	12.0415	0.83467	0.259158	4.87249
GOTERM_BP_FAT	GO:0060548~negative regulation of cell death	4	9.30233	0.00344198	AKT1, CDH13, CFDP1, API5	18	107	5798	12.0415	0.83467	0.259158	4.87249
GOTERM_BP_FAT	GO:0007242~intracellular signaling cascade	5	11.6279	0.021465	AKT1, CDH13, ING4, VAV3, RAB23	18	378	5798	4.26073	0.999988	0.801726	26.9745
GOTERM_BP_FAT	GO:0042127~regulation of cell proliferation	4	9.30233	0.0280739	CDH13, ING4, CFDP1, NR5A2	18	231	5798	5.57768	1	0.741095	33.8034
Annotation Cluster 3	Enrichment Score: 1.4087108322964335
Category	Term	Count	%	PValue	Genes	List Total	Pop Hits	Pop Total	Fold Enrichment	Bonferroni	Benjamini	FDR
GOTERM_BP_FAT	GO:0006915~apoptosis	3	6.97674	0.0344723	AKT1, APP, API5	18	101	5798	9.56766	1	0.755519	39.8442
GOTERM_BP_FAT	GO:0012501~programmed cell death	3	6.97674	0.036374	AKT1, APP, API5	18	104	5798	9.29167	1	0.748801	41.5381
GOTERM_BP_FAT	GO:0008219~cell death	3	6.97674	0.0423191	AKT1, APP, API5	18	113	5798	8.55162	1	0.756034	46.5515
GOTERM_BP_FAT	GO:0016265~death	3	6.97674	0.0436877	AKT1, APP, API5	18	115	5798	8.4029	1	0.726225	47.6475
Annotation Cluster 4	Enrichment Score: 1.3665699351913414
Category	Term	Count	%	PValue	Genes	List Total	Pop Hits	Pop Total	Fold Enrichment	Bonferroni	Benjamini	FDR
GOTERM_BP_FAT	GO:0040008~regulation of growth	3	6.97674	0.0307935	AKT1, ING4, APP	18	95	5798	10.1719	1	0.743487	36.4369
GOTERM_BP_FAT	GO:0022402~cell cycle process	3	6.97674	0.0376644	AKT1, ING4, APP	18	106	5798	9.11635	1	0.737116	42.662
GOTERM_BP_FAT	GO:0007049~cell cycle	3	6.97674	0.0685331	AKT1, ING4, APP	18	148	5798	6.52928	1	0.800366	64.2471
Annotation Cluster 5	Enrichment Score: 1.2627757091718794
Category	Term	Count	%	PValue	Genes	List Total	Pop Hits	Pop Total	Fold Enrichment	Bonferroni	Benjamini	FDR
GOTERM_BP_FAT	GO:0010604~positive regulation of macromolecule metabolic process	4	9.30233	0.0434215	AKT1, CDH13, APP, NR5A2	18	274	5798	4.70235	1	0.744136	47.436
GOTERM_CC_FAT	GO:0042995~cell projection	3	6.97674	0.0497773	AKT1, CDH13, APP	12	127	3811	7.50197	0.965607	0.965607	40.6695
GOTERM_MF_FAT	GO:0042802~identical protein binding	3	6.97674	0.0753245	AKT1, CDH13, APP	21	151	6610	6.25355	0.999603	0.791173	58.072
Annotation Cluster 6	Enrichment Score: 1.2487458449397324
Category	Term	Count	%	PValue	Genes	List Total	Pop Hits	Pop Total	Fold Enrichment	Bonferroni	Benjamini	FDR
GOTERM_BP_FAT	GO:0043549~regulation of kinase activity	3	6.97674	0.0239566	AKT1, APP, VAV3	18	83	5798	11.6426	0.999997	0.794477	29.6226
GOTERM_BP_FAT	GO:0051338~regulation of transferase activity	3	6.97674	0.0250463	AKT1, APP, VAV3	18	85	5798	11.3686	0.999998	0.770347	30.7524
GOTERM_BP_FAT	GO:0042325~regulation of phosphorylation	3	6.97674	0.0486083	AKT1, APP, VAV3	18	122	5798	7.92077	1	0.745638	51.4176
GOTERM_BP_FAT	GO:0019220~regulation of phosphate metabolic process	3	6.97674	0.0522438	AKT1, APP, VAV3	18	127	5798	7.60892	1	0.75352	54.0389
GOTERM_BP_FAT	GO:0051174~regulation of phosphorus metabolic process	3	6.97674	0.0522438	AKT1, APP, VAV3	18	127	5798	7.60892	1	0.75352	54.0389
GOTERM_BP_FAT	GO:0007166~cell surface receptor linked signal transduction	4	9.30233	0.404181	AKT1, APP, VAV3, GABRA6	18	778	5798	1.6561	1	0.999837	99.9448
Annotation Cluster 7	Enrichment Score: 1.2016563278029029
Category	Term	Count	%	PValue	Genes	List Total	Pop Hits	Pop Total	Fold Enrichment	Bonferroni	Benjamini	FDR
GOTERM_BP_FAT	GO:0030030~cell projection organization	3	6.97674	0.0344723	CDH13, APP, VAV3	18	101	5798	9.56766	1	0.755519	39.8442
GOTERM_BP_FAT	GO:0006928~cell motion	3	6.97674	0.059802	CDH13, APP, VAV3	18	137	5798	7.05353	1	0.768491	59.0727
GOTERM_CC_FAT	GO:0005886~plasma membrane	5	11.6279	0.120461	CDH13, APP, VAV3, GABRA6, MLF2	12	688	3811	2.30802	0.999791	0.985531	73.0819
Annotation Cluster 8	Enrichment Score: 1.0551113197037287
Category	Term	Count	%	PValue	Genes	List Total	Pop Hits	Pop Total	Fold Enrichment	Bonferroni	Benjamini	FDR
GOTERM_BP_FAT	GO:0042592~homeostatic process	4	9.30233	0.0262177	AKT1, APP, PPP3CB, NR5A2	18	225	5798	5.72642	0.999999	0.750133	31.9481
GOTERM_BP_FAT	GO:0010604~positive regulation of macromolecule metabolic process	4	9.30233	0.0434215	AKT1, CDH13, APP, NR5A2	18	274	5798	4.70235	1	0.744136	47.436
GOTERM_BP_FAT	GO:0051173~positive regulation of nitrogen compound metabolic process	3	6.97674	0.136338	AKT1, APP, NR5A2	18	222	5798	4.35285	1	0.953133	88.0387
GOTERM_BP_FAT	GO:0010557~positive regulation of macromolecule biosynthetic process	3	6.97674	0.139349	AKT1, APP, NR5A2	18	225	5798	4.29481	1	0.950849	88.6289
GOTERM_BP_FAT	GO:0031328~positive regulation of cellular biosynthetic process	3	6.97674	0.146437	AKT1, APP, NR5A2	18	232	5798	4.16523	1	0.953167	89.9128
GOTERM_BP_FAT	GO:0009891~positive regulation of biosynthetic process	3	6.97674	0.147456	AKT1, APP, NR5A2	18	233	5798	4.14735	1	0.948907	90.0859
Annotation Cluster 9	Enrichment Score: 0.748872879549214
Category	Term	Count	%	PValue	Genes	List Total	Pop Hits	Pop Total	Fold Enrichment	Bonferroni	Benjamini	FDR
GOTERM_BP_FAT	GO:0042592~homeostatic process	4	9.30233	0.0262177	AKT1, APP, PPP3CB, NR5A2	18	225	5798	5.72642	0.999999	0.750133	31.9481
GOTERM_BP_FAT	GO:0006793~phosphorus metabolic process	3	6.97674	0.464936	AKT1, APP, PPP3CB	18	526	5798	1.83714	1	0.999963	99.9884
GOTERM_BP_FAT	GO:0006796~phosphate metabolic process	3	6.97674	0.464936	AKT1, APP, PPP3CB	18	526	5798	1.83714	1	0.999963	99.9884
Annotation Cluster 10	Enrichment Score: 0.5136850530283148
Category	Term	Count	%	PValue	Genes	List Total	Pop Hits	Pop Total	Fold Enrichment	Bonferroni	Benjamini	FDR
GOTERM_MF_FAT	GO:0043167~ion binding	9	20.9302	0.131371	CDH13, ING4, VAV3, FDX1, GABRA6, PPP3CB, ZNF384, NR5A2, KCNIP4	21	1746	6610	1.62248	0.999999	0.904376	79.0541
GOTERM_MF_FAT	GO:0046872~metal ion binding	8	18.6047	0.24461	CDH13, ING4, VAV3, FDX1, PPP3CB, ZNF384, NR5A2, KCNIP4	21	1715	6610	1.46828	1	0.98182	95.556
GOTERM_MF_FAT	GO:0043169~cation binding	8	18.6047	0.256851	CDH13, ING4, VAV3, FDX1, PPP3CB, ZNF384, NR5A2, KCNIP4	21	1739	6610	1.44801	1	0.97554	96.293
GOTERM_MF_FAT	GO:0046914~transition metal ion binding	6	13.9535	0.278562	ING4, VAV3, FDX1, PPP3CB, ZNF384, NR5A2	21	1180	6610	1.60048	1	0.973427	97.3325
SP_PIR_KEYWORDS	metal-binding	4	9.30233	0.422418	ING4, VAV3, FDX1, NR5A2	19	438	3361	1.61548	1	0.999955	99.6751
SP_PIR_KEYWORDS	zinc	3	6.97674	0.459079	ING4, VAV3, NR5A2	19	285	3361	1.86205	1	0.999873	99.8361
GOTERM_MF_FAT	GO:0008270~zinc ion binding	4	9.30233	0.568848	ING4, VAV3, ZNF384, NR5A2	21	956	6610	1.317	1	0.999778	99.9912
Annotation Cluster 11	Enrichment Score: 0.2154325864070505
Category	Term	Count	%	PValue	Genes	List Total	Pop Hits	Pop Total	Fold Enrichment	Bonferroni	Benjamini	FDR
SP_PIR_KEYWORDS	signal	4	9.30233	0.48262	CDH13, CNTNAP5, GABRA6, SEMA3D	19	478	3361	1.48029	1	0.99967	99.897
SP_PIR_KEYWORDS	disulfide bond	3	6.97674	0.561875	CNTNAP5, GABRA6, SEMA3D	19	343	3361	1.54718	1	0.999817	99.9818
UP_SEQ_FEATURE	signal peptide	4	9.30233	0.585676	CDH13, CNTNAP5, GABRA6, SEMA3D	14	476	2121	1.27311	1	1	99.9815
UP_SEQ_FEATURE	disulfide bond	3	6.97674	0.620411	CNTNAP5, GABRA6, SEMA3D	14	328	2121	1.38567	1	1	99.9921
SP_PIR_KEYWORDS	glycoprotein	3	6.97674	0.690997	CDH13, GABRA6, SEMA3D	19	430	3361	1.23415	1	0.999978	99.9995
UP_SEQ_FEATURE	glycosylation site:N-linked (GlcNAc...)	3	6.97674	0.748766	CDH13, GABRA6, SEMA3D	14	410	2121	1.10854	1	1	99.9999
Annotation Cluster 12	Enrichment Score: 0.20769168390921727
Category	Term	Count	%	PValue	Genes	List Total	Pop Hits	Pop Total	Fold Enrichment	Bonferroni	Benjamini	FDR
GOTERM_BP_FAT	GO:0006355~regulation of transcription, DNA-dependent	3	6.97674	0.563779	ING4, APP, NR5A2	18	628	5798	1.53875	1	0.999998	99.9994
GOTERM_BP_FAT	GO:0051252~regulation of RNA metabolic process	3	6.97674	0.57283	ING4, APP, NR5A2	18	638	5798	1.51463	1	0.999998	99.9996
GOTERM_BP_FAT	GO:0045449~regulation of transcription	3	6.97674	0.737548	ING4, APP, NR5A2	18	853	5798	1.13286	1	1	100
Annotation Cluster 13	Enrichment Score: 0.1523123644184734
Category	Term	Count	%	PValue	Genes	List Total	Pop Hits	Pop Total	Fold Enrichment	Bonferroni	Benjamini	FDR
GOTERM_CC_FAT	GO:0031224~intrinsic to membrane	6	13.9535	0.459687	CDH13, APP, CYB5R2, CNTNAP5, GABRA6, NUP93	12	1514	3811	1.25859	1	0.999961	99.8153
GOTERM_CC_FAT	GO:0016021~integral to membrane	5	11.6279	0.663327	APP, CYB5R2, CNTNAP5, GABRA6, NUP93	12	1461	3811	1.08687	1	0.999999	99.9985
UP_SEQ_FEATURE	transmembrane region	3	6.97674	0.742005	CYB5R2, CNTNAP5, GABRA6	14	405	2121	1.12222	1	1	99.9998
SP_PIR_KEYWORDS	membrane	4	9.30233	0.829834	CDH13, CYB5R2, CNTNAP5, GABRA6	19	787	3361	0.899084	1	0.999998	100
SP_PIR_KEYWORDS	transmembrane	3	6.97674	0.922253	CYB5R2, CNTNAP5, GABRA6	19	717	3361	0.740145	1	1	100
Annotation Cluster 14	Enrichment Score: 0.07586292574606134
Category	Term	Count	%	PValue	Genes	List Total	Pop Hits	Pop Total	Fold Enrichment	Bonferroni	Benjamini	FDR
GOTERM_MF_FAT	GO:0000166~nucleotide binding	4	9.30233	0.785818	HAO1, AKT1, EFTUD1, RAB23	21	1304	6610	0.965527	1	0.999999	100
GOTERM_MF_FAT	GO:0032555~purine ribonucleotide binding	3	6.97674	0.852243	AKT1, EFTUD1, RAB23	21	1055	6610	0.895058	1	1	100
GOTERM_MF_FAT	GO:0032553~ribonucleotide binding	3	6.97674	0.852243	AKT1, EFTUD1, RAB23	21	1055	6610	0.895058	1	1	100
GOTERM_MF_FAT	GO:0017076~purine nucleotide binding	3	6.97674	0.871163	AKT1, EFTUD1, RAB23	21	1105	6610	0.854557	1	1	100
