# Supplementary material for: Genetic assessment of inbred chicken lines indicates genomic signatures of resistance to Marek’s disease
Source: J Anim Sci Biotechnol. 2018 Sep 13;9:65. doi: 10.1186/s40104-018-0281-x (PMC6136188; doi:10.1186/s40104-018-0281-x)
Supplement: Supplementary file 4 — Table S3. The inbreeding coefficient (F) for all 30 samples using 155,216 high quality SNPs. (XLSX 11 kb) [file 40104_2018_281_MOESM4_ESM.xlsx]

## Sheet: Inbreed_F
FID	IID	O(HOM)	E(HOM)	N(NM)	F
RCS-C	C1	147134	97050	155145	0.8621
RCS-C	C2	149204	97010	155095	0.8986
RCS-C	C3	146318	97010	155095	0.8489
RCS-J	J1	150274	96990	155075	0.9173
RCS-J	J2	148719	97000	155084	0.8904
RCS-J	J3	147826	96770	154787	0.88
RCS-M	M11	147766	97010	155108	0.8736
RCS-M	M4	145914	97040	155128	0.8414
RCS-M	M5	148351	97010	155099	0.8838
RCS-N	N1	147892	97060	155163	0.8749
RCS-N	N2	144766	97050	155146	0.8213
RCS-N	N3	148398	97020	155109	0.8845
RCS-S	S1	153536	97030	155123	0.9727
RCS-S	S2	150852	97020	155105	0.9268
RCS-S	S5	150506	96840	154875	0.9247
RCS-X	X1	145945	97010	155078	0.8427
RCS-X	X3	146290	97060	155153	0.8474
RCS-X	X4	149439	97000	155085	0.9028
F1-63.72	10_1U_6X7_F1	6653	96560	154479	-1.552
F1-63.72	13_1U_6X7_F1	7951	96860	154896	-1.532
F1-63.72	4_1U_6X7_F1	8633	97000	155063	-1.522
F1-72.63	1_1U_7X6_F1	8082	96890	154935	-1.53
F1-72.63	6_1U_7X6_F1	7902	96770	154811	-1.531
F1-72.63	8_1U_7X6_F1	8517	96940	154989	-1.523
line63	14_4U_M_6_3	153988	96970	155030	0.9821
line63	15_4U_M_6_3	154134	97010	155087	0.9836
line63	5_4U_M_6_3	153939	97020	155096	0.9801
line72	10_4U_M_7_2	152367	96800	154832	0.9575
line72	13_4U_M_7_2	151558	96730	154745	0.9451
line72	4_4U_M_7_2	152282	96900	154938	0.9542
