# Supplementary material for: Genetic assessment of inbred chicken lines indicates genomic signatures of resistance to Marek’s disease
Source: J Anim Sci Biotechnol. 2018 Sep 13;9:65. doi: 10.1186/s40104-018-0281-x (PMC6136188; doi:10.1186/s40104-018-0281-x)
Supplement: Supplementary file 5 — Table S4. Summary statistics and ROH distributions among 8 diverse inbred lines including lines 63, 72, C, J, M, N, S and X. (XLSX 31 kb) [file 40104_2018_281_MOESM5_ESM.xlsx]

## Sheet: Table S4
	Table S4 Summary statistics of ROH in 8 inbred lines, including line 63, line 72 and lines C, J, M, N, S and X.
				NSNP					KB				DENSITY
	Lines	ROH Counts	NSNP	Max	Mean	Median	min	ROH	Max	Mean	Median	Min		Max	Mean	Median	Min
			Count					Length
	Line72	406	452903	6257	1116	765	71	2595859	43776	6394	3785	525		29.6	5.7	5.6	1.7
	Line63	206	462142	13423	2243	1574	91	2716053	90126	13185	8594	528		13.7	5.6	5.3	2.1
	LineC	231	441453	11067	1911	1377	83	2594500	73628	11232	6100	519		17.1	5.7	5.2	2.4
	LineJ	314	445048	11065	1417	991	72	2569728	73303	8184	4533	519		22.5	5.6	5.2	2.5
	LineM	236	440694	7995	1867	1467	56	2579066	56953	10928	7219	524		22.2	5.7	5.4	2.4
	LineN	217	439490	13423	2025	1421	75	2564519	90125	11818	6567	513		20.1	5.6	5.3	2.6
	LineS	264	454745	9621	1723	1203	79	2635823	63043	9984	6022	516		18.1	5.8	5.4	2.3
	LineX	333	439576	9616	1320	789	53	2512011	63043	7543	3974	505		31.3	5.8	5.3	2.4
	RCS_total	1595	2661006					15455647
	Total	2207	3576051					20767559

## Sheet: Line63
Chr	Start	End	State
1	37788	73665671	roh
1	74927657	138540000	roh
1	138558868	153158011	roh
1	153171833	179804570	roh
1	179828336	195240963	roh
2	18868	18318831	roh
2	18339647	27905798	roh
2	27925003	67522406	roh
2	67671347	110453405	roh
2	110998464	129081326	roh
2	129202238	148805605	roh
3	283157	11360738	roh
3	11749635	47389132	roh
3	47404021	82028628	roh
3	82043740	106582630	roh
3	106742165	110446702	roh
4	70775	90196443	roh
5	197	19610640	roh
5	19733899	46712651	roh
5	47748848	49957327	roh
5	50142507	59540202	roh
6	25808	34902119	roh
7	17045	36069020	roh
8	73997	8622052	roh
8	8969750	28733315	roh
9	58063	8122186	roh
9	8162217	15418408	roh
9	15457856	23427176	roh
10	42912	6142619	roh
10	6151434	19848011	roh
11	12472	4960635	roh
11	4970162	19393519	roh
12	24215	19614507	roh
13	96541	17716051	roh
14	47916	15132783	roh
15	32042	1044757	roh
15	1055700	2422203	roh
15	2437512	12650049	roh
17	227460	1094237	roh
17	1114478	10445687	roh
18	33349	11194875	roh
19	1042	5599016	roh
19	6009002	9982593	roh
20	53331	14299525	roh
21	356308	3359808	roh
21	3372070	6790918	roh
22	3898	1414726	roh
22	1456495	4075684	roh
23	4380	5710193	roh
24	161481	4045462	roh
24	4057663	5057716	roh
24	5110956	6316539	roh
25	1802	2190307	roh
26	28930	2923435	roh
26	2941449	4456569	roh
26	4682432	5213717	roh
27	20305	5197484	roh
28	8681	4739069	roh

## Sheet: Line72
Chr	Start	End	State
1	37788	14737619	roh
1	14761071	32867802	roh
1	32891778	73665671	roh
1	74927657	77596019	roh
1	77624993	109242985	roh
1	109282432	123125293	roh
1	123211617	138945306	roh
1	139664041	180738839	roh
1	180798437	186682651	roh
1	186699141	195240963	roh
2	18868	41137311	roh
2	41259715	45830503	roh
2	45863714	71924589	roh
2	71954714	74095232	roh
2	74136897	81585659	roh
2	81976325	148761875	roh
3	283157	5893804	roh
3	5945586	14424787	roh
3	14438452	54072665	roh
3	55346259	65953211	roh
3	65986859	110446702	roh
4	1591935	8189969	roh
4	8210091	33193323	roh
4	33215273	61817810	roh
4	61853503	90196443	roh
5	197	9183117	roh
5	9699301	46712651	roh
5	47748848	59540202	roh
6	25808	24885348	roh
6	24910657	26911851	roh
6	26931407	29813758	roh
6	29847461	34902119	roh
7	17045	12630826	roh
7	12645594	34243109	roh
7	34331563	36069020	roh
8	73997	28733315	roh
9	58063	23427176	roh
10	42912	6511740	roh
10	6610641	19848011	roh
11	12472	5609496	roh
11	5667228	12273104	roh
11	12289194	19393519	roh
12	24215	19840335	roh
13	96541	17716051	roh
14	47916	15132783	roh
15	32042	1044757	roh
15	1055700	7098429	roh
15	7114680	12650049	roh
17	227460	4261013	roh
17	4328026	7135557	roh
17	7164266	10445687	roh
18	376304	7785350	roh
18	7838766	11194875	roh
19	1042	6479060	roh
19	6497996	9982593	roh
20	53331	9035322	roh
20	9055582	14299525	roh
21	356308	3553636	roh
21	3557160	6790918	roh
22	3898	4077139	roh
23	4380	5710193	roh
24	623362	5300373	roh
24	5319957	6316539	roh
25	1802	910413	roh
25	962671	2190307	roh
26	28930	5213717	roh
27	441324	1708135	roh
27	2728892	5197484	roh
28	108095	2064929	roh
28	2122112	3116632	roh
28	3164927	4739069	roh

## Sheet: C
Chr	Start	End	State
1	37788	73665671	roh
1	75971289	77596019	roh
1	77624993	131992755	roh
1	132128785	138751080	roh
1	139664041	176846798	roh
1	178173886	180738839	roh
1	180798437	184721537	roh
1	184745426	195240963	roh
2	18868	27905798	roh
2	27925003	67522406	roh
2	67671347	110453405	roh
2	110998464	129081326	roh
2	129202238	148805605	roh
3	283157	82028628	roh
3	82043740	110446702	roh
4	70775	61817810	roh
4	61853503	90196443	roh
5	197	9183117	roh
5	9698432	19610640	roh
5	19733899	46712651	roh
5	47748848	59540202	roh
6	25808	34902119	roh
7	17045	36069020	roh
8	73997	8622052	roh
8	8969750	24896057	roh
8	24906714	28733315	roh
9	58063	15418408	roh
9	15457856	23427176	roh
10	42912	6142619	roh
10	6151434	19581113	roh
11	12472	4960635	roh
11	4972034	19393519	roh
12	24215	19614507	roh
13	96541	8782374	roh
13	8859434	17716051	roh
14	47916	15132783	roh
15	32042	1044757	roh
15	1055700	2422203	roh
15	2437512	12650049	roh
17	227460	6492686	roh
17	6503571	10445687	roh
18	33349	11194875	roh
19	1042	5895012	roh
19	6009002	9982593	roh
20	53331	14299525	roh
21	356308	3553636	roh
21	3597278	6790918	roh
22	3898	1414726	roh
22	1456495	4075684	roh
23	4380	5710193	roh
24	640738	4045462	roh
24	4057663	6316539	roh
25	1802	1247955	roh
25	1440997	2190307	roh
26	28930	2923435	roh
26	2941449	4456745	roh
26	4682432	5213717	roh
27	20305	5197484	roh
28	8681	4739069	roh

## Sheet: L
Chr	Start	End	State
1	37788	73665671	roh
1	75540537	123125293	roh
1	123211617	138540000	roh
1	138558868	153158011	roh
1	153171833	179804570	roh
1	179828336	181509254	roh
1	188236127	195240963	roh
2	18868	18318831	roh
2	18339647	27356339	roh
2	27386802	30405303	roh
2	30792343	32585332	roh
2	33350848	67522406	roh
2	67671347	109473874	roh
2	110990300	129081326	roh
2	129202238	148805605	roh
3	283157	47389132	roh
3	47404021	110446702	roh
4	70775	90196443	roh
5	197	9183117	roh
5	9698432	19623305	roh
5	19733899	46712651	roh
5	47748848	50630279	roh
5	50636865	59540202	roh
6	25808	26911851	roh
6	26931407	34902119	roh
7	17045	36069020	roh
8	73997	28733315	roh
9	58063	8122186	roh
9	8162217	15418408	roh
9	15457856	23427176	roh
10	42912	6142619	roh
10	6151434	19581113	roh
11	12472	5609496	roh
11	5667228	12278219	roh
11	12289384	19393519	roh
12	24215	19840335	roh
13	96541	6696631	roh
13	6707726	17716051	roh
14	47916	15132783	roh
15	32042	928305	roh
15	1282312	1906603	roh
15	2284699	12650049	roh
17	227460	1094237	roh
17	1114478	2285903	roh
17	3130901	10445687	roh
18	376304	1010440	roh
18	1019330	7785350	roh
18	7949026	11194875	roh
19	1042	5599016	roh
19	6009002	9982593	roh
20	53331	12011632	roh
20	12029391	14299525	roh
21	356308	2295180	roh
21	2755821	6790918	roh
22	3898	4075684	roh
23	4380	5710193	roh
24	640738	4045462	roh
24	4057663	6316539	roh
25	1802	2190307	roh
26	28930	2923435	roh
26	2941449	4456569	roh
26	4682432	5213717	roh
27	58589	5197484	roh
28	8681	4739069	roh

## Sheet: M
Chr	Start	End	State
1	37788	25195429	roh
1	25263591	32867802	roh
1	32891778	73665671	roh
1	74927657	131992755	roh
1	132009128	138751080	roh
1	139664041	153158011	roh
1	155066555	179804570	roh
1	179828336	195240963	roh
2	18868	18318831	roh
2	18339647	27905798	roh
2	27925003	67522406	roh
2	67671347	110453405	roh
2	110998464	129081326	roh
2	129202238	148805605	roh
3	283157	14424787	roh
3	14438452	20320996	roh
3	22192083	47389132	roh
3	47404021	82028628	roh
3	82043740	103950453	roh
3	103967724	110446702	roh
4	70775	33193323	roh
4	33215273	90196443	roh
5	197	9183117	roh
5	9698432	19610640	roh
5	19733899	46712651	roh
5	47748848	49957327	roh
5	50142507	59540202	roh
6	25808	34902119	roh
7	17045	31081431	roh
7	31101980	36069020	roh
8	73997	28733315	roh
9	58063	8122186	roh
9	8162217	15418408	roh
9	15457856	23427176	roh
10	42912	6142619	roh
10	6151434	19848011	roh
11	12472	4960635	roh
11	4972034	15114063	roh
11	15325556	19393519	roh
12	24215	19840335	roh
13	96541	12545847	roh
13	14943876	17716051	roh
14	47916	15132783	roh
15	32042	1044757	roh
15	1055700	2422203	roh
15	2437512	12650049	roh
17	227460	10445687	roh
18	33349	11194875	roh
19	1042	5599016	roh
19	6009002	9982593	roh
20	53331	14299525	roh
21	356308	3359808	roh
21	3372070	6790918	roh
22	3898	1414726	roh
22	1456495	4077139	roh
23	4380	5710193	roh
24	640738	4050998	roh
24	4057663	5300373	roh
24	5319957	6316539	roh
25	1802	2190307	roh
26	28930	2923435	roh
26	2941449	4456569	roh
26	4682432	5213717	roh
27	20305	5197484	roh
28	8681	4739069	roh

## Sheet: N
Chr	Start	End	State
1	37788	38430880	roh
1	45190827	73665671	roh
1	74927657	131992755	roh
1	132009128	138751080	roh
1	139664041	153158011	roh
1	153171833	179804570	roh
1	179828336	195240963	roh
2	18868	18318831	roh
2	18339647	69579418	roh
2	75699772	85017999	roh
2	86867768	110453405	roh
2	110998464	129081326	roh
2	129202238	148805605	roh
3	283157	16357970	roh
3	17154370	98776857	roh
3	99044473	110446702	roh
4	70775	90196443	roh
5	197	9183117	roh
5	9698432	19610640	roh
5	19727619	46712651	roh
5	47748848	49957327	roh
5	49978597	59540202	roh
6	25808	34902119	roh
7	17045	36069020	roh
8	73997	8622052	roh
8	8969750	28733315	roh
9	58063	951082	roh
9	1119265	8122186	roh
9	8162217	23427176	roh
10	42912	6142619	roh
10	6151434	19581113	roh
11	12472	4960635	roh
11	5762656	9376414	roh
11	9384814	14148013	roh
11	14175529	15313445	roh
11	15325556	19393519	roh
12	24215	19840335	roh
13	96541	2973605	roh
13	5726952	15002696	roh
13	15010833	17716051	roh
14	47916	15132783	roh
15	32042	1044757	roh
15	1055700	2422203	roh
15	2437512	12650049	roh
17	227460	1094237	roh
17	1114478	10445687	roh
18	33349	11194875	roh
19	1042	5599016	roh
19	6009002	9982593	roh
20	53331	14299525	roh
21	356308	3359808	roh
21	3372070	6790918	roh
22	3898	1414726	roh
22	1456495	4077139	roh
23	4380	5710193	roh
24	619118	4045462	roh
24	4057663	6316539	roh
25	1802	2190307	roh
26	28930	2923435	roh
26	2941449	4456569	roh
26	4682432	5213717	roh
27	58589	5197484	roh
28	8681	4739069	roh

## Sheet: S
Chr	Start	End	State
1	37788	73340804	roh
1	75540537	131992755	roh
1	132128785	138540000	roh
1	138558868	153158011	roh
1	153171833	179804570	roh
1	179828336	195240963	roh
2	18868	71924589	roh
2	71954714	81585659	roh
2	81976325	110453405	roh
2	110998464	129081326	roh
2	129202238	148805605	roh
3	283157	47389132	roh
3	47404021	110446702	roh
4	70775	61817810	roh
4	61853503	90196443	roh
5	197	9183117	roh
5	9698432	19610640	roh
5	19733899	46712651	roh
5	47748848	49957327	roh
5	50142507	59540202	roh
6	25808	34902119	roh
7	17045	36069020	roh
8	73997	28733315	roh
9	58063	8122186	roh
9	8162217	15418408	roh
9	15457856	23427176	roh
10	42912	6142619	roh
10	6151434	19848011	roh
11	12472	4960635	roh
11	4972034	14148013	roh
11	14175529	15313445	roh
11	15325556	19393519	roh
12	24215	19614507	roh
13	96541	7897022	roh
13	7932293	17716051	roh
14	47916	15132783	roh
15	32042	1044757	roh
15	1055700	12650049	roh
17	227460	1094237	roh
17	1114478	10445687	roh
18	33349	11194875	roh
19	1042	748127	roh
19	1598483	5599016	roh
19	6009002	9982593	roh
20	53331	14299525	roh
21	356308	3359808	roh
21	3372070	6790918	roh
22	3898	1414726	roh
22	1456495	4075684	roh
23	4380	5710193	roh
24	640738	4045462	roh
24	4057663	6316539	roh
25	1802	2190307	roh
26	28930	2923435	roh
26	2941449	4456569	roh
26	4682432	5213717	roh
27	58589	5197484	roh
28	8681	4739069	roh

## Sheet: X
Chr	Start	End	State
1	37788	59013825	roh
1	60384994	73665671	roh
1	75971289	131992755	roh
1	132128785	138540000	roh
1	138558868	153158011	roh
1	153171833	179804570	roh
1	179828336	195240963	roh
2	18868	18318831	roh
2	18339647	27905798	roh
2	27925003	67522406	roh
2	67671347	110601212	roh
2	110998464	129081326	roh
2	129202238	148805605	roh
3	283157	47389132	roh
3	47404021	110446702	roh
4	70775	30554887	roh
4	30585081	42001800	roh
4	43065953	53684915	roh
4	53889915	90196443	roh
5	1590130	9161038	roh
5	9696471	19610640	roh
5	19733899	46712651	roh
5	47748848	49957327	roh
5	50142507	55163249	roh
5	55285102	59540202	roh
6	25808	34902119	roh
7	17045	2651394	roh
7	3700375	36069020	roh
8	73997	4130393	roh
8	4217321	12832352	roh
8	12983072	28733315	roh
9	58063	8122186	roh
9	8162217	15418408	roh
9	15457856	23427176	roh
10	42912	6142619	roh
10	6151434	19581113	roh
11	12472	4960635	roh
11	4972034	19393519	roh
12	24215	3074174	roh
12	3581987	16257306	roh
12	17870304	19439921	roh
13	96541	6696631	roh
13	6707726	8782374	roh
13	8859434	17716051	roh
14	47916	15132783	roh
15	32042	1044757	roh
15	1055700	2422203	roh
15	2437512	12650049	roh
17	227460	1095177	roh
17	1114273	10445687	roh
18	33349	11194875	roh
19	1042	5599016	roh
19	6009002	9982593	roh
20	53331	14299525	roh
21	356308	3359808	roh
21	3372070	6790918	roh
22	3898	1414726	roh
22	1456495	4075684	roh
23	4380	5710193	roh
24	161481	4045462	roh
24	4057663	6316539	roh
25	1802	1368485	roh
26	28930	2923435	roh
26	2941449	4456569	roh
26	4682432	5213717	roh
27	58589	5197484	roh
28	8681	4739069	roh
