# Supplementary material for: Genetic assessment of inbred chicken lines indicates genomic signatures of resistance to Marek’s disease
Source: J Anim Sci Biotechnol. 2018 Sep 13;9:65. doi: 10.1186/s40104-018-0281-x (PMC6136188; doi:10.1186/s40104-018-0281-x)
Supplement: Supplementary file 6 — Table S5. Unique and shared homozygous segments across all chickens included RCS lines and line 63 chickens were compared with the line 72. (XLSX 13 kb) [file 40104_2018_281_MOESM6_ESM.xlsx]

## Sheet: cc_uni72_63rcs
5	9183118	9696470	513353	uni63_72rcs
2	110601213	110990299	389087	uni72_63rcs
2	129081327	129202237	120911	uni72_63rcs
5	19623306	19727618	104313	uni72_63rcs
10	6142620	6151433	8814	uni72_63rcs
19	5895013	6009001	113989	uni72_63rcs
24	4050999	4057662	6664	uni72_63rcs
26	2923436	2941448	18013	uni72_63rcs
26	4456746	4682431	225686	uni72_63rcs
1	14737620	14761070	23451	in63rcsout72
1	32867803	32891777	23975	in63rcsout72
1	77596020	77624992	28973	in63rcsout72
1	109242986	109282431	39446	in63rcsout72
1	123125294	123211616	86323	in63rcsout72
1	138945307	139664040	718734	in63rcsout72
1	180738840	180798436	59597	in63rcsout72
1	186682652	186699140	16489	in63rcsout72
2	41137312	41259714	122403	in63rcsout72
2	45830504	45863713	33210	in63rcsout72
2	71924590	71954713	30124	in63rcsout72
2	74095233	74136896	41664	in63rcsout72
2	81585660	81976324	390665	in63rcsout72
2	148761876	148805605	43730	in63rcsout72
3	5893805	5945585	51781	in63rcsout72
3	14424788	14438451	13664	in63rcsout72
3	54072666	55346258	1273593	in63rcsout72
3	65953212	65986858	33647	in63rcsout72
4	70775	1591934	1521160	in63rcsout72
4	8189970	8210090	20121	in63rcsout72
4	33193324	33215272	21949	in63rcsout72
4	61817811	61853502	35692	in63rcsout72
5	9696471	9699300	2830	in63rcsout72
6	24885349	24910656	25308	in63rcsout72
6	26911852	26931406	19555	in63rcsout72
6	29813759	29847460	33702	in63rcsout72
7	12630827	12645593	14767	in63rcsout72
7	34243110	34331562	88453	in63rcsout72
10	6511741	6610640	98900	in63rcsout72
11	5609497	5667227	57731	in63rcsout72
11	12273105	12289193	16089	in63rcsout72
15	7098430	7114679	16250	in63rcsout72
17	4261014	4328025	67012	in63rcsout72
17	7135558	7164265	28708	in63rcsout72
18	33349	376303	342955	in63rcsout72
18	7785351	7838765	53415	in63rcsout72
19	6479061	6497995	18935	in63rcsout72
20	9035323	9055581	20259	in63rcsout72
21	3553637	3557159	3523	in63rcsout72
24	161481	623361	461881	in63rcsout72
24	5300374	5319956	19583	in63rcsout72
25	910414	962670	52257	in63rcsout72
27	20305	441323	421019	in63rcsout72
27	1708136	2728891	1020756	in63rcsout72
28	8681	108094	99414	in63rcsout72
28	2064930	2122111	57182	in63rcsout72
28	3116633	3164926	48294	in63rcsout72
